# Supplementary material for: Short maternal stature and gestational weight gain among refugee and migrant women birthing appropriate for gestational age term newborns: a retrospective cohort on the Myanmar-Thailand border, 2004–2016
Source: HighWire-hosted journal article supplement (doi:10.1136/bmjgh-2020-004325), 2021-02-01
Supplement: bmjgh-2020-004325supp001_data_supplement.pdf [file bmjgh-2020-004325supp001_data_supplement.pdf]

**Supplemental Table.** Maternal characteristics, pregnancy complications and birth outcomes (small-, large-, and appropriate for gestational age) by BMI category (n=5611).

|                              | N     | All               | Underweight<br><18.5 kg/m <sup>2</sup> | Normal<br>18.5-24.9 kg/m <sup>2</sup> | Overweight<br>25-29.9 kg/m <sup>2</sup> | Obese<br>≥30 kg/m <sup>2</sup> |
|------------------------------|-------|-------------------|----------------------------------------|---------------------------------------|-----------------------------------------|--------------------------------|
| <i>Maternal demographics</i> | 5,611 | 5,611             | 919 (16.4%)                            | 4,120 (73.4%)                         | 479 (8.5%)                              | 93 (1.7%)                      |
| Median age (IQR); yrs        | 5,611 | 24 (21, 28)       | 23 (20, 26)                            | 24 (21, 28)                           | 27 (23, 30)                             | 29 (25, 31)                    |
| Refugees                     | 5,611 | 4,070 (72.5%)     | 597 (65.0%)                            | 3,014 (73.2%)                         | 379 (79.1%)                             | 80 (86.0%)                     |
| Migrants                     | 5,611 | 1,541 (27.5%)     | 322 (35.0%)                            | 1,106 (26.8%)                         | 100 (20.9%)                             | 13 (14.0%)                     |
| Ethnicity                    | 4,238 |                   |                                        |                                       |                                         |                                |
| Karen                        |       | 3,049             | 450 (63.9%)                            | 2,304 (74.5%)                         | 252 (70.2%)                             | 43 (51.8%)                     |
| Burman                       |       | 702               | 170 (24.1%)                            | 481 (15.6%)                           | 40 (11.1%)                              | 11 (13.3%)                     |
| Burmese Muslim               |       | 487               | 84 (11.9%)                             | 307 (9.9%)                            | 67 (18.7%)                              | 29 (34.9%)                     |
| Primigravida (G1P0)          | 5,611 | 1,663 (29.6%)     | 360 (39.2%)                            | 1,216 (29.5%)                         | 80 (16.7%)                              | 7 (7.5%)                       |
| Mean height (SD), cm         | 5,611 | 151.2 (5.26)      | 151.7 (5.32)                           | 151.1 (5.25)                          | 151.4 (5.08)                            | 151.4 (5.60)                   |
| Short (<153cm)               | 5,611 | 3,398 (60.6%)     | 545 (59.3%)                            | 2,511 (60.9%)                         | 289 (60.3%)                             | 53 (57.0%)                     |
| Mean GWG (SD); kg            | 5,611 | 9.6 (3.8)         | 10.5 (3.4)                             | 9.8 (3.7)                             | 7.6 (4.1)                               | 6.0 (4.8)                      |
| <i>Birth outcomes</i>        |       |                   |                                        |                                       |                                         |                                |
| Median EGA (IQR); wks        | 5,611 | 39.2 (38.5, 39.6) | 39.2 (38.4, 39.6)                      | 39.2 (38.5, 39.6)                     | 39.3 (38.5, 40.0)                       | 39.4 (38.6, 40.0)              |
| Mean BW (SD); g              | 5,611 | 3038.8 (375.3)    | 2903.7 (358.1)                         | 3044.5 (366.3)                        | 3196.9 (381.4)                          | 3308.7 (401.7)                 |
| SGA IG-21                    | 5,611 | 963 (17.2%)       | 254 (27.6%)                            | 658 (16.0%)                           | 46 (9.6%)                               | 5 (5.4%)                       |
| SGA GROW                     | 5,611 | 460 (8.2%)        | 100 (10.9%)                            | 309 (7.5%)                            | 42 (8.8%)                               | 9 (9.7%)                       |
| AGA IG-21                    | 5,611 | 4,516 (80.5%)     | 658 (71.6%)                            | 3,370 (81.8%)                         | 407 (85.0%)                             | 81 (87.1%)                     |
| AGA GROW                     | 5,611 | 4,882 (87.0%)     | 787 (85.6%)                            | 3,605 (87.5%)                         | 412 (86.0%)                             | 78 (83.9%)                     |
| LGA IG-21                    | 5,611 | 132 (2.4%)        | 7 (0.8%)                               | 92 (2.2%)                             | 26 (5.4%)                               | 7 (7.5%)                       |
| LGA GROW                     | 5,611 | 269 (4.8%)        | 32 (3.5%)                              | 206 (5.0%)                            | 25 (5.2%)                               | 6 (6.5%)                       |

Abbreviations: AGA appropriate for gestational age, G gravida, GROW Gestation Related Optimal Weight, IG-21 Intergrowth-21<sup>st</sup>, IQR interquartile range, LGA large for gestational age, P parity, SGA small for gestational age, SD standard deviation
